# Supplementary material for: Permeability Transition Pore-Mediated Mitochondrial Superoxide Flashes Regulate Cortical Neural Progenitor Differentiation
Source: PubMed Central journal article supplement (PMC3792897; doi:10.1371/journal.pone.0076721), 2013-10-08
Supplement: pone.0076721.s001.pdf [file pone.0076721.s001.pdf]

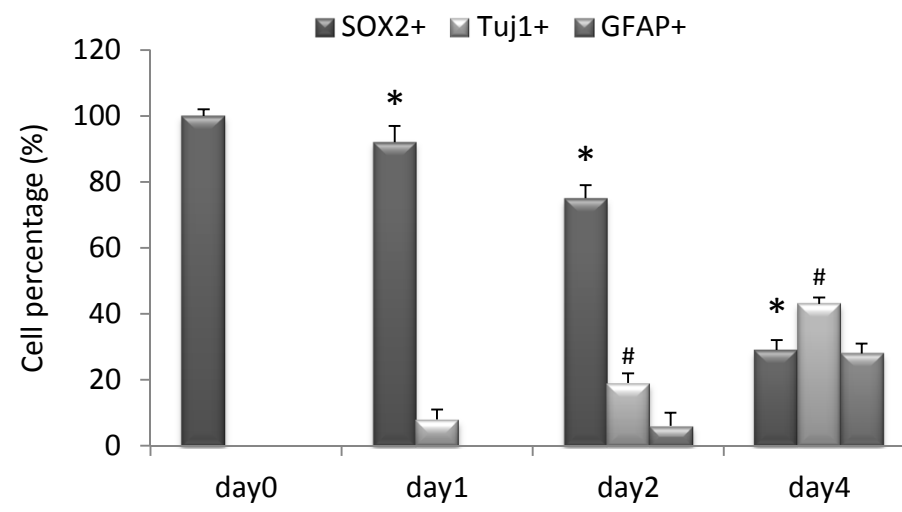

Fig. S1.
